# Supplementary material for: Social cognition in aggressive offenders: Impaired empathy, but intact theory of mind
Source: PubMed Central journal article supplement (PMC5429629; doi:10.1038/s41598-017-00745-0), 2017-04-06
Supplement: 41598_2017_745_MOESM1_ESM.pdf [file 41598_2017_745_MOESM1_ESM.pdf]

# Supplementary material

## Social cognition in aggressive offenders: Impaired empathy, but intact theory of mind

Korina Winter<sup>1,2</sup>, Stephanie Spengler<sup>1</sup>, Felix BERPohl<sup>1</sup>, Tania Singer<sup>3</sup>, Philipp Kanske<sup>3\*</sup>

<sup>1</sup>Department of Psychiatry and Psychotherapie, Charité-Universitätsmedizin Berlin, Germany

<sup>2</sup>Department of Forensic Psychiatry, Krankenhaus d. Maßregelvollzugs Berlin, Germany

<sup>3</sup>Department of Social Neuroscience, Max Planck Institute for Human Cognitive and Brain Sciences, Leipzig, Germany

\*Corresponding author:

Philipp Kanske, Department of Social Neuroscience, Max Planck Institute for Human Cognitive and Brain Sciences, Stephanstr. 1a,  
04103 Leipzig, Germany (e-mail: kanske@cbs.mpg.de)

**S1 Normal Distribution Testing:** *Demonstrating used variables did not significantly deviate from normal distribution (all  $p > .05$ ), parametric tests were used for the statistical analysis.*

| <i>Questionnaire/Scales</i>           | <i>Shapiro-Wilk</i> | <i>asymmetry</i> | <i>kurtosis</i> |
|---------------------------------------|---------------------|------------------|-----------------|
| Aggression (BPAQ sum score)           | .105                | .340             | -.710           |
| Physical Aggression (BPAQ)            | .034                | .381             | -.627           |
| Anger (BPAQ)                          | .040                | .422             | -.648           |
| Hostility (BPAQ)                      | .027                | .660             | .079            |
| Verbal Aggression (BPAQ)              | .602                | .129             | -.324           |
| Reactive Aggression (RPQ)             | .009                | .514             | -.489           |
| Proactive Aggression (RPQ)            | .000                | 1.852            | 3.035           |
| Alexithymia (TAS sum score)           | .560                | -.324            | -.044           |
| Difficulty identifying feelings (TAS) | .090                | .414             | -.371           |
| Difficulty describing feelings (TAS)  | .107                | -.262            | -.412           |
| Externally oriented thinking (TAS)    | .141                | .475             | -.047           |
| Intelligence (Wortschatz WST)         | .055                | -.451            | -.139           |
| Empathy rating emotional              | .970                | .90              | -.754           |
| Empathy rating neutral                | .920                | 1.065            | 1.343           |
| Compassion rating emotional           | .889                | -1.384           | 2.170           |
| Compassion rating neutral             | .914                | -.159            | -1.454          |
| ToM performance                       | .0571               | -.77             | 0,388           |
| Factual reasoning performance         | .0388               | -.506            | 1,051           |

Note: *BPAQ* Buss-Perry-Aggression-Questionnaire, *RPQ*=Reactive-Proactive-Aggression, *TAS*= Toronto-Alexithymia-Scale, *Intelligence*=Verbal Intelligence/Wortschatztest.

**S2 Group Differences in aggression and alexithymia self-reports:** *Univariate analysis with IQ and years of education as covariate reporting group differences between control and experimental (=men with a history of aggressive behaviour) groups, demonstrating significantly higher aggression in the experimental compared to the control group (as indicated in increased Buss-Perry-Aggression-Questionnaire (BPAQ) and Reactive-Proactive Aggression Questionnaire (RPQ) scores), as well as higher scores of alexithymia (Toronto-Alexithymia-Scale).*

|                                                           | <i>Aggressive</i> |           | <i>Controls</i> |           | <i>Covariates</i> |                |                  |                           |                |                  |
|-----------------------------------------------------------|-------------------|-----------|-----------------|-----------|-------------------|----------------|------------------|---------------------------|----------------|------------------|
|                                                           | <i>MEAN</i>       | <i>SD</i> | <i>MEAN</i>     | <i>SD</i> | <i>IQ</i>         |                |                  | <i>Years of education</i> |                |                  |
|                                                           |                   |           |                 |           | <i>F</i>          | <i>p value</i> | <i>d (cohen)</i> | <i>F</i>                  | <i>p value</i> | <i>d (cohen)</i> |
| <b><i>Buss-Perry-Aggression-Questionnaire</i></b>         |                   |           |                 |           |                   |                |                  |                           |                |                  |
| Physical Aggression                                       | 36.759            | 11.716    | 21.912          | 8.346     | 6.027             | .017**         | 0.655            | 29.228                    | .001***        | 1.5              |
| Verbal Aggression                                         | 20.345            | 5.334     | 17.618          | 6.035     | .150              | .700           | 0.103            | 2.116                     | .152           | .402             |
| Anger                                                     | 25.690            | 8.146     | 17.118          | 5.493     | 3.939             | .052           | 0.529            | 19.454                    | .001***        | 1.22             |
| Hostility                                                 | 27.483            | 11.134    | 18.912          | 6.820     | 4.100             | .047*          | 0.54             | 8.684                     | .005**         | .143             |
| Aggression Sum Score                                      | 110.276           | 29.366    | 75.559          | 20.465    | 5.272             | .025*          | 0.613            | 21.754                    | .001***        | .817             |
| <b><i>Reactive-Proactive Aggression Questionnaire</i></b> |                   |           |                 |           |                   |                |                  |                           |                |                  |
| Proactive Aggression                                      | 5.929             | 5.956     | 1.794           | 2.267     | 5.630             | .021**         | 0.633            | 7.613                     | .008**         | .766             |
| Reactive Aggression                                       | 11.339            | 5.052     | 4.441           | 3.751     | 2.128             | .150           | 0.389            | 34.399                    | .001***        | 1.62             |
| Reactive-Proactiv Aggr. Sum Score                         | 17.268            | 10.160    | 6.235           | 5.549     | 4.068             | .048**         | 0.538            | 21.673                    | .001***        | 1.29             |
| <b><i>Toronto-Alexithymia-Scale</i></b>                   |                   |           |                 |           |                   |                |                  |                           |                |                  |
| Difficulty identifying feelings                           | 14.964            | 4.484     | 12.179          | 3.580     | .958              | .332           | 0.261            | 4.976                     | .030**         | .617             |
| Difficulty describing feelings                            | 14.107            | 3.178     | 12.536          | 4.910     | 1.307             | .258           | 0.305            | 1.019                     | .317           | .278             |
| Externally oriented thinking                              | 17.071            | 4.422     | 13.857          | 3.894     | 5.902             | .018**         | 0.648            | 4.382                     | .078           | .581             |
| Alexithymia Sum Score                                     | 46.143            | 6.969     | 38.571          | 7.089     | 6.457             | .014**         | 0.678            | 9.985                     | .003**         | .876             |

Note: \*indicates statistical significant p-value: \*  $p \leq 0.05$ , \*\*  $p \leq 0.01$ , \*\*\*  $p \leq 0.001$

**S3 Correlations between EmpaToM ratings and aggression/alexithymia questionnaires applying IQ & years of education as covariates:**

S3 (A) Bivariate correlations with IQ as covariate endorse significant negative correlation between compassion and aggression (reactive-proactive-aggression; RPQ).

|                          | <b>Buss-Perry-Aggression-Qu.<br/>(BPAQ; Sum Score)</b> |                | <b>Reactive-Proactive-Aggression<br/>(RPQ, Sum Score)</b> |                | <b>Toronto Alexithymia Scale<br/>(TAS-26, Sum Score)</b> |                |
|--------------------------|--------------------------------------------------------|----------------|-----------------------------------------------------------|----------------|----------------------------------------------------------|----------------|
|                          | <i>r</i>                                               | <i>p value</i> | <i>r</i>                                                  | <i>p value</i> | <i>r</i>                                                 | <i>p value</i> |
| <i>EmpaToM behaviour</i> |                                                        |                |                                                           |                |                                                          |                |
| Empathy                  | -.283                                                  | .044           | -.322                                                     | .021           | -.268                                                    | .058           |
| Compassion               | -.135                                                  | .345           | -.369                                                     | .008**         | -.312                                                    | .026           |
| ToM                      | .228                                                   | .108           | .084                                                      | .559           | .141                                                     | .324           |

| <b>Toronto Alexithymia Scale<br/>(TAS-26, Sum Score)</b> |                |
|----------------------------------------------------------|----------------|
|                                                          | <i>p value</i> |
| <i>Questionnaires</i>                                    |                |
| BPAQ Sum Score                                           | .107           |
| RPQ Sum Score                                            | .157           |

Note: Bonferroni correction was applied to account for multiple testing \* $p \leq .017$

S3 (B) Bivariate correlations with years of education as covariate indicating a negative correlation between both empathy and compassion and aggression (RPQ) as well as a negative correlation between empathy and alexithymia.

|                          | <b>Buss-Perry-Aggression-Qu.<br/>(BPAQ; Sum Score)</b> |                | <b>Reactive-Proactive-Aggression<br/>(RPQ Sum Score)</b> |                | <b>Toronto Alexithymia Scale<br/>(TAS-26, Sum Score)</b> |                |
|--------------------------|--------------------------------------------------------|----------------|----------------------------------------------------------|----------------|----------------------------------------------------------|----------------|
|                          | <i>r</i>                                               | <i>p value</i> | <i>r</i>                                                 | <i>p value</i> | <i>r</i>                                                 | <i>p value</i> |
| <i>EmpaToM behaviour</i> |                                                        |                |                                                          |                |                                                          |                |
| Empathy                  | -.208                                                  | .140           | -.347                                                    | .012**         | -.402                                                    | .003**         |
| Compassion               | -.132                                                  | .351           | -.388                                                    | .004**         | -.309                                                    | .026           |
| ToM                      | .210                                                   | .138           | -.085                                                    | .554           | .104                                                     | .467           |

| <b>Toronto Alexithymia Scale<br/>(TAS-26, Sum Score)</b> |                |
|----------------------------------------------------------|----------------|
|                                                          | <i>p value</i> |
| <i>Questionnaires</i>                                    |                |
| BPAQ Sum Score                                           | .080           |
| RPQ Sum Score                                            | .131           |

Note: Bonferroni correction was applied to account for multiple testing \* $p \leq .017$

**S4 EmpaToM measures analysed by means of separate repeated-measures analyses of variance with IQ and years of education as covariate:**

*S4(A) EmpaToM behaviour with IQ as covariate: significant interaction effect between group and valence in the empathy condition. Post-hoc analysis with IQ as covariate approves likewise that the experimental group showed significantly less negative affect after watching emotionally negative videos (=emotional negative condition) than the control group. In the compassion condition with IQ as covariate main effect of valence remained significant, as well as the marginally significant interaction of emotionality and group.*

| <b>EmpaToM behaviour</b>                               | <b>F</b> | <b>df</b> | <b>Sig.</b> | <b>eta<sup>2</sup></b> | <b>d</b> |
|--------------------------------------------------------|----------|-----------|-------------|------------------------|----------|
| <i>Empathy. ANCOVA covariate intelligence (WST)</i>    |          |           |             |                        |          |
| Main Effect of Group                                   | 2.001    | 1.56      | .163        | .1467                  | .383     |
| Main Effect of Valence                                 | 2.109    | 1.56      | .152        | .0372                  | .393     |
| Interaction (group vs. emotionality)                   | 4.478    | 1.56      | .039*       | .077                   | .577     |
| Post-hoc: Emotional negative condition vs. Group       |          |           |             |                        |          |
| Mean Diff.= -1.102 (SE=.101)                           | 5.271    | 1.56      | .026*       | .0882                  | .622     |
| <i>Compassion. ANCOVA covariate intelligence (WST)</i> |          |           |             |                        |          |
| Main Effect of Group                                   | 1.817    | 1.56      | .183        | .0322                  | .365     |
| Main Effect of Valence                                 | 9.916    | 1.56      | .003**      | .1536                  | .852     |
| Interaction (group vs. emotionality)                   | 3.055    | 1.56      | .086        | .054                   | .478     |
| Post-hoc: Emotional negative condition vs. Group       |          |           |             |                        |          |
| Mean Diff.= 3.902 (SE=.158)                            | 4.294    | 1.56      | .043**      | .074                   | .530     |
| <i>ToM. ANCOVA covariate intelligence (WST)</i>        |          |           |             |                        |          |
| Main Effect of Group                                   | .753     | 1.56      | .389        | .0136                  | .235     |
| Main Effect of ToM                                     | 1.974    | 1.56      | .166        | .0354                  | .383     |
| Interaction                                            | .274     | 1.56      | .603        | .005                   | .142     |

Note: \*indicates statistical significant p-value: \*  $p \leq 0.05$ , \*\*  $p \leq 0.01$ , \*\*\*  $p \leq 0.001$

*S4(B) EmpaToM behaviour with years of education as covariate: interaction effect between group and valence remained significant in the empathy condition. The subsequent post-hoc analysis with years of education as covariate confirmed that the experimental group showed significantly less negative affect after watching emotionally negative videos (=emotional negative condition) than the control group. In the compassion condition either the main effect of valence nor the interaction effect did remained (marginally) significant.*

| <b>EmpaToM behaviour</b>                               | <b>F</b> | <b>df</b> | <b>Sig.</b> | <b>eta<sup>2</sup></b> | <b>d</b> |
|--------------------------------------------------------|----------|-----------|-------------|------------------------|----------|
| <i>Empathy. ANCOVA covariate years of education</i>    |          |           |             |                        |          |
| Main Effect of Group                                   | 1.963    | 1.56      | .167        | .0338                  | .374     |
| Main Effect of Valence                                 | 1.668    | 1.56      | .202        | .0289                  | .345     |
| Interaction (group vs. emotionality)                   | 5.787    | 1.56      | .019**      | .0934                  | .642     |
| Post-hoc: Emotional negative condition vs. Group       |          |           |             |                        |          |
| Mean Diff.: -1.109 (SE=.097)                           | 6.313    | 1.56      | .015**      | .101                   | .695     |
| <i>Compassion. ANCOVA covariate years of education</i> |          |           |             |                        |          |
| Main Effect of Group                                   | 2.038    | 1.56      | .159        | .035                   | .381     |
| Main Effect of Valence                                 | .095     | 1.56      | .760        | .0017                  | .082     |
| Interaction (group vs. emotionality)                   | 2.687    | 1.56      | .107        | .0456                  | .437     |
| Post-hoc: Emotional negative condition vs. Group       |          |           |             |                        |          |
| Mean Diff.: 3.911 (SE=.153)                            | 4.463    | 1.56      | .039**      | .074                   | .546     |
| <i>ToM. ANCOVA covariate years of education</i>        |          |           |             |                        |          |
| Main Effect of Group                                   | .460     | 1.56      | .501        | .0082                  | .182     |
| Main Effect of ToM                                     | .491     | 1.56      | .918        | .0088                  | .188     |
| Interaction (Group vs. ToM)                            | .500     | 1.56      | .483        | .0089                  | .19      |

Note: \*indicates statistical significant p-value: \*  $p \leq 0.05$ , \*\*  $p \leq 0.01$ , \*\*\*  $p \leq 0.001$

**S5 Correlation between EmpaToM measures and aggression self-reports:** *Reactive-Proactive-Aggression scores correlated negatively across groups with empathy ratings (RPQ:  $r=-.342$ ,  $p=.004$ ; BPAQ:  $r=-3.22$ ,  $p=.048$  n.s. after Bonferroni correction) and compassion ratings (RPQ:  $r=-.355$ ,  $p=.006$ ; BPAQ:  $r=-.132$ ,  $p=.319$ ), but not with ToM performance (BPAQ:  $r=.072$ ,  $p=.589$ ; RPQ:  $r=.089$ ,  $p=.505$ ). For simplification the empathy-scoring scheme was multiplied by minus one so that high scores in the rating system reflect high empathic responding.*

**A Empathy and RPQ**

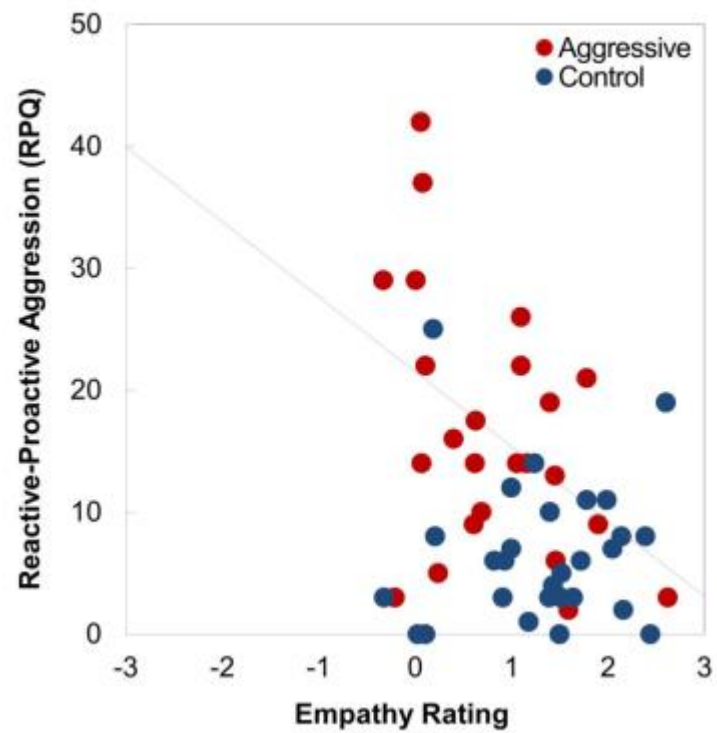

**B Compassion and RPQ**

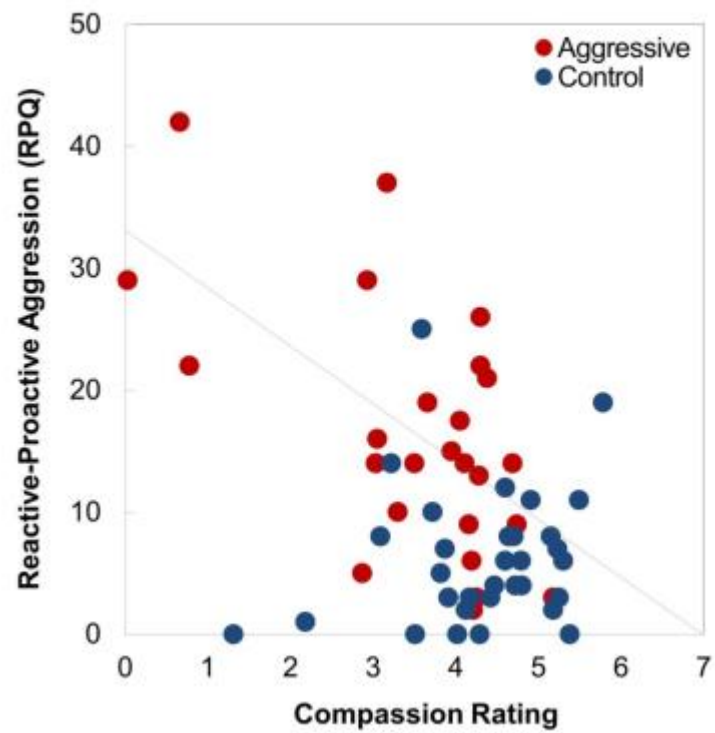

**C Empathy and BPAQ**

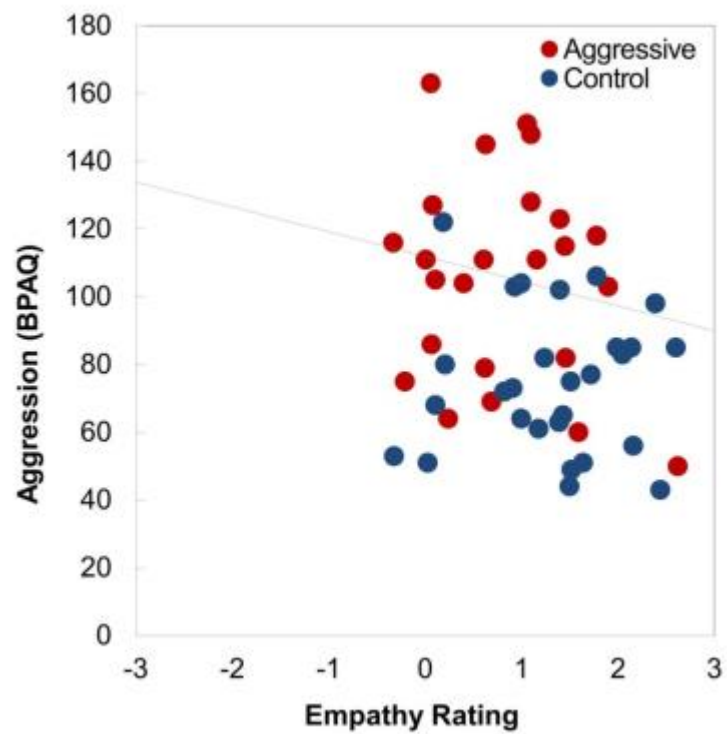

**D Compassion and BPAQ**

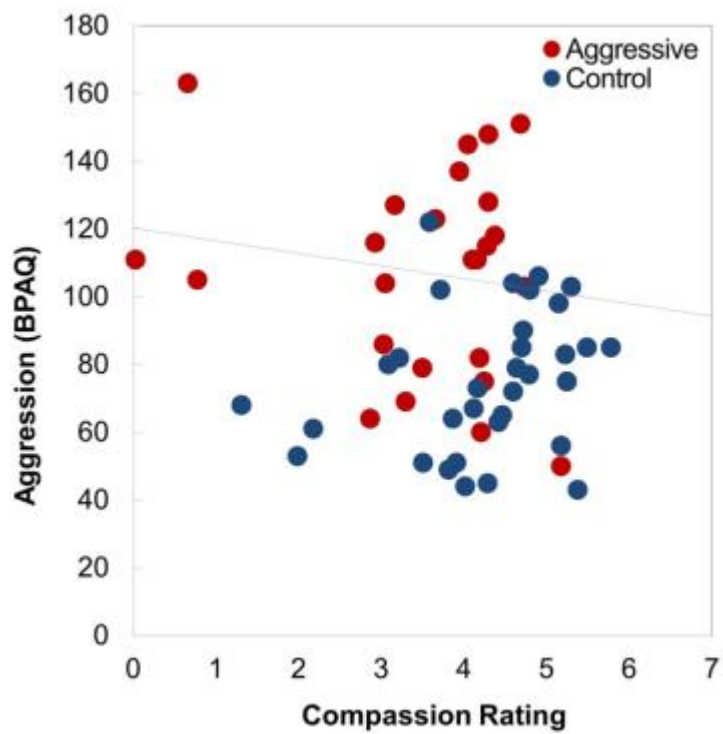

**S6 Correlation between Alexithymia and EmpaToM measures/ aggression self-reports:** *Empathy and compassion correlated negatively across groups with alexithymia (empathy:  $r=-.460$ ,  $p=.001$ , compassion:  $r=-.32$ ,  $p=.016$ ). For simplification the empathy-scoring scheme multiplied by minus one so that high scores in the rating system reflect high empathic responding.*

**A Empathy and TAS**

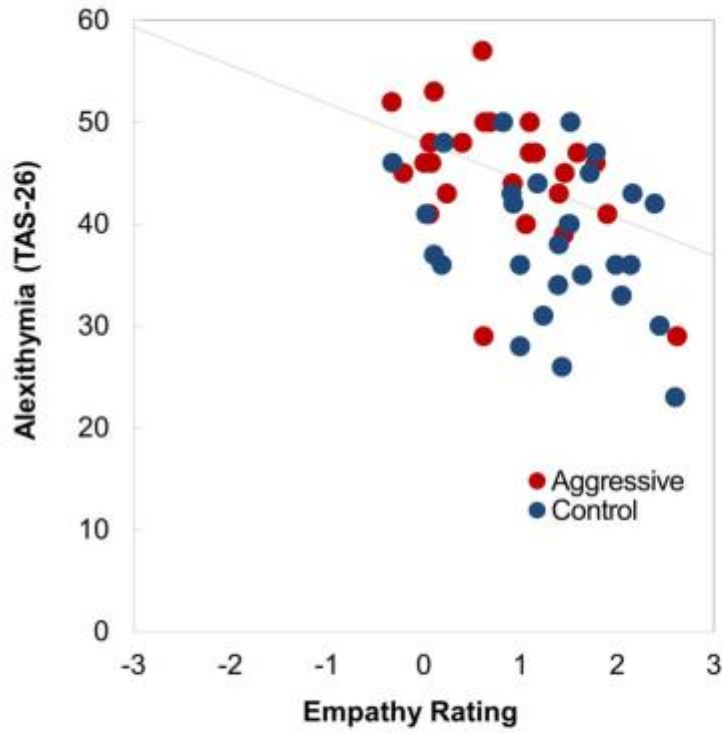

**B Compassion and TAS**

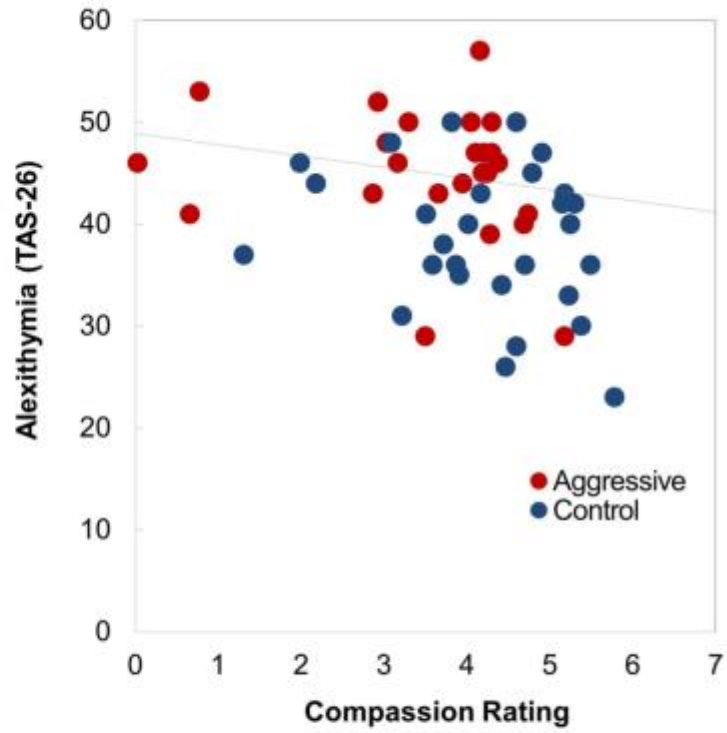

**C BPAQ and TAS**

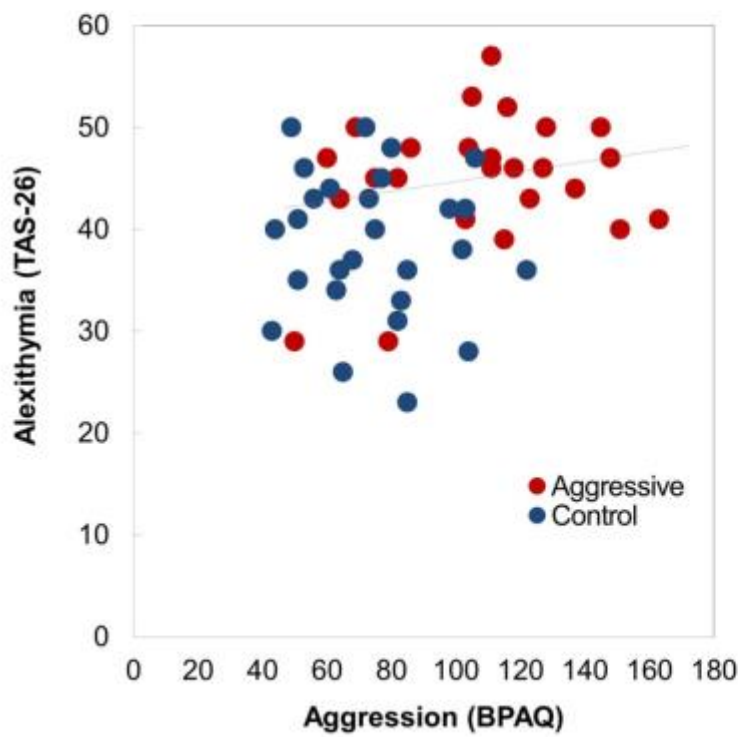

**D RPQ and TAS**

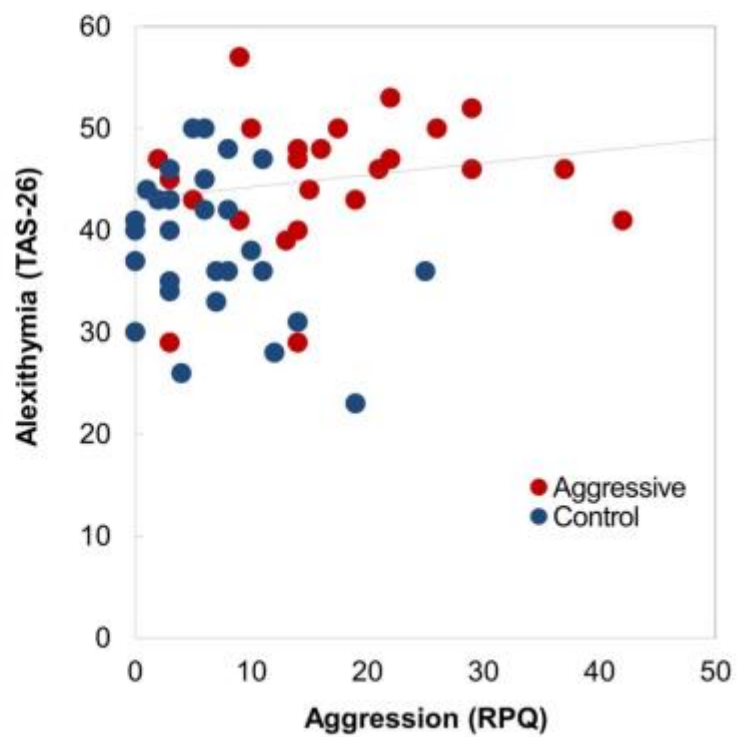

**S7 Results of the mediation analysis with covariates: IQ and years of education influence alexithymia in mediating empathic responding and compassion significantly.**

| Covariate                                               | Model                                                         | Coefficient                                          | SE     | t       | p       |
|---------------------------------------------------------|---------------------------------------------------------------|------------------------------------------------------|--------|---------|---------|
| <b>Alexithymia mediates reduced empathic responding</b> |                                                               |                                                      |        |         |         |
|                                                         | Model summary                                                 | R <sup>2</sup> = .1004, F(2.50) = 5.6940, p = .0208* |        |         |         |
| <b>none</b>                                             | Effect of Group affiliation (GA) on mediator                  | -6.4686                                              | 1.8870 | -3.4279 | .0012** |
|                                                         | Direct effect of mediator on empathic responding              | -.0424                                               | .0168  | -2.513  | .0150** |
|                                                         | Total effect of GA on empathic responding                     | .4988                                                | .2126  | 2.3457  | .0229** |
|                                                         | Direct effect of GA on empathic responding                    | .2248                                                | .2528  | .8892   | .3781   |
|                                                         | Indirect effect of GA on empathic responding through mediator | effect = .2740 (SE = .1260), 95%CI: .0737 to .6027   |        |         |         |

Note: significant mediation as path a, b, c are significant but not c'

**Alexithymia mediates reduced empathic responding**

|           |                                                               |                                                      |        |         |         |
|-----------|---------------------------------------------------------------|------------------------------------------------------|--------|---------|---------|
|           | Model summary                                                 | R <sup>2</sup> = .1133, F(2.50) = 3.1959, p = .0494* |        |         |         |
| <b>IQ</b> | Effect of Group affiliation (GA) on mediator                  | -5.398                                               | 2.0702 | -2.6075 | .0012** |
|           | Direct effect of mediator on empathic responding              | -.0413                                               | .015   | -2.7473 | .0084** |
|           | Total effect of GA on empathic responding                     | .4103                                                | .2338  | 1.7549  | .0854   |
|           | Direct effect of GA on empathic responding                    | .1876                                                | .2343  | .8005   | .4273   |
|           | Indirect effect of GA on empathic responding through mediator | effect = .2227 (SE = .1408), 95%CI: .0351 to .6264   |        |         |         |

Note: no significant mediation (a, b path significant, but not c)

**Alexithymia mediates reduced empathic responding**

|                           |                                                               |                                                      |        |         |         |
|---------------------------|---------------------------------------------------------------|------------------------------------------------------|--------|---------|---------|
|                           | Model summary                                                 | R <sup>2</sup> = .1297, F(2.50) = 6.233, p = .0311** |        |         |         |
| <b>Years of Education</b> | Effect of Group affiliation (GA) on mediator                  | -5.0666                                              | 1.8628 | -2.7199 | .009**  |
|                           | Direct effect of mediator on empathic responding              | -.04                                                 | .0157  | -2.5503 | .0139** |
|                           | Total effect of GA on empathic responding                     | .413                                                 | .2179  | 1.8952  | .0639   |
|                           | Direct effect of GA on empathic responding                    | .2101                                                | .2216  | .9481   | .3477   |
|                           | Indirect effect of GA on empathic responding through mediator | effect = .2029(SE = .1322), 95%CI: .0199 to .5568    |        |         |         |

Note: no significant mediation (a, b path significant, but not c)

**Alexithymia mediates reduced compassion**

|             |                                                               |                                                      |        |         |         |
|-------------|---------------------------------------------------------------|------------------------------------------------------|--------|---------|---------|
|             | Model summary                                                 | R <sup>2</sup> = .0789, F(2.50) = 4.3664, p = .0417* |        |         |         |
| <b>none</b> | Effect of Group affiliation (GA) on mediator                  | -6.4686                                              | 1.8622 | -.4736  | .0011** |
|             | Direct effect of mediator on empathic responding              | -.0424                                               | .0243  | -1.7400 | .0880   |
|             | Total effect of GA on empathic responding                     | .6898                                                | .3301  | 2.0896  | .0417*  |
|             | Direct effect of GA on empathic responding                    | .4158                                                | .3600  | 1.1550  | .2536   |
|             | Indirect effect of GA on empathic responding through mediator | effect = .2740 (SE = .1602), 95%CI: .0251 to .6758   |        |         |         |

Note: no significant mediation (a, c path significant, but not b)

**Alexithymia mediates reduced compassion**

|           |                                                               |                                                    |        |         |        |
|-----------|---------------------------------------------------------------|----------------------------------------------------|--------|---------|--------|
|           | Model summary                                                 | R <sup>2</sup> = .806, F(2.50) = 2.1918, p = .1223 |        |         |        |
| <b>IQ</b> | Effect of Group affiliation (GA) on mediator                  | -5.398                                             | 2.0702 | -2.6075 | .0012* |
|           | Direct effect of mediator on empathic responding              | -.0422                                             | .0249  | -1.6941 | .0966  |
|           | Total effect of GA on empathic responding                     | .6392                                              | .3716  | 1.72    | .0916  |
|           | Direct effect of GA on empathic responding                    | .4112                                              | .3889  | 1.0576  | .2954  |
|           | Indirect effect of GA on empathic responding through mediator | effect = .2279 (SE = .1693). 95%CI: .0143 to .6526 |        |         |        |

Note: no significant mediation (a path significant, but not b and c)

**Alexithymia mediates reduced compassion**

|                           |                                                               |                                                     |        |         |        |
|---------------------------|---------------------------------------------------------------|-----------------------------------------------------|--------|---------|--------|
|                           | Model summary                                                 | R <sup>2</sup> = .0803, F(2.50) = 2.1817, p = .1235 |        |         |        |
| <b>Years of Education</b> | Effect of Group affiliation (GA) on mediator                  | -5.0666                                             | 1.8628 | -2.7199 | .009** |
|                           | Direct effect of mediator on empathic responding              | -.045                                               | .026   | -1.7284 | .0902  |
|                           | Total effect of GA on empathic responding                     | .6605                                               | .3497  | 1.8891  | .0647  |
|                           | Direct effect of GA on empathic responding                    | .4362                                               | .3674  | 1.773   | .2448  |
|                           | Indirect effect of GA on empathic responding through mediator | effect = .2280 (SE = .1688), 95%CI: .0053 to .6953  |        |         |        |

Note: no significant mediation (a path significant, but not b and c)

Note: \*indicates statistical significant p-value: \* p ≤ 0.05, \*\* p ≤ 0.01, \*\*\* p ≤ 0.001



**S8 Intragroup correlations between IQ/years of education and EmpaToM measures:** *No correlation between empathy measures and years of education or IQ nor between compassion measures and years of education or IQ were found, when within-group correlational analyses were carried out.*

|                    |                             | <i>Aggressive</i> |         | <i>Controls</i> |         |
|--------------------|-----------------------------|-------------------|---------|-----------------|---------|
|                    |                             | r                 | p value | r               | p value |
| IQ                 | Empathy rating (EmpaToM)    | .287              | .155    | -.140           | .451    |
|                    | Compassion rating (EmpaToM) | .004              | .984    | -.111           | .551    |
| Years of Education | Empathy rating (EmpaToM)    | .174              | .397    | .063            | .726    |
|                    | Compassion rating (EmpaToM) | -.019             | .926    | .044            | .806    |
